# Supplementary material for: Plasmon-Sensitized Silica-Titanium Aerogels as Potential Photocatalysts for Organic Pollutants and Bacterial Strains
Source: ACS Omega. 2023 Sep 4;8(37):33857–69. doi: 10.1021/acsomega.3c04556 (PMC10515350; doi:10.1021/acsomega.3c04556)
Supplement: Supplementary file 1 — ao3c04556_si_001.pdf [file ao3c04556_si_001.pdf]

## Supporting Information

### Plasmon-Sensitized Silica-Titanium Aerogels as Potential Photocatalysts for Organic Pollutants and Bacterial Strains

*Ecem Tiryaki<sup>1,2,\*</sup>, Sevil Yücel<sup>2</sup>, Miguel A. Correa-Duarte<sup>3</sup>*

<sup>1</sup>Nanomaterials for Biomedical Applications, Italian Institute of Technology (IIT), 16163,  
Genova, Italy

<sup>2</sup>Department of Bioengineering, Faculty of Chemical and Metallurgical Engineering, Yildiz  
Technical University, 34220, Esenler, Istanbul, Turkey

<sup>3</sup>CINBIO, Universidade Vigo, 36310 Vigo, Spain, Southern Galicia Institute of Health  
Research (IISGS), and CIBERSAM, 36310, Vigo, Spain

**Table S1.** The specific surface area and pore volume/size values of SiO<sub>2</sub> aerogels and SiO<sub>2</sub>/TiO<sub>2</sub> composite aerogels with different titanium concentrations

|                                                          | <i>BET surface area</i><br><i>(m<sup>2</sup>g<sup>-1</sup>)</i> | <i>BJH</i><br><i>Desorption</i><br><i>Pore volume</i><br><i>(cm<sup>3</sup>g<sup>-1</sup>)</i> | <i>BJH</i><br><i>Desorption</i><br><i>Pore size</i><br><i>(nm)</i> |
|----------------------------------------------------------|-----------------------------------------------------------------|------------------------------------------------------------------------------------------------|--------------------------------------------------------------------|
| <i>SiO<sub>2</sub></i>                                   | 447.9                                                           | 0.7                                                                                            | 8.1                                                                |
| <i>SiO<sub>2</sub>-TiO<sub>2</sub></i><br><i>(0.04M)</i> | 379.8                                                           | 0.6                                                                                            | 8.5                                                                |
| <i>SiO<sub>2</sub>-TiO<sub>2</sub></i><br><i>(0.09M)</i> | 282.8                                                           | 0.4                                                                                            | 8.3                                                                |
| <i>SiO<sub>2</sub>-TiO<sub>2</sub></i><br><i>(0.17M)</i> | 178.8                                                           | 0.3                                                                                            | 7.9                                                                |

**Table S2.** Surface atomic percentages of main elements in SiO<sub>2</sub> and SiO<sub>2</sub>/TiO<sub>2</sub> aerogels (XPS analysis)

| <i>Material</i>                        | <i>Atomic Percentage (at. %)</i> |                         |            |            |
|----------------------------------------|----------------------------------|-------------------------|------------|------------|
|                                        | <i>Si2p</i>                      | <i>Ti2p (Ti4+/Ti3+)</i> | <i>O1s</i> | <i>C1s</i> |
| <i>SiO<sub>2</sub></i>                 | 32.5                             | -                       | 64.9       | 2.4        |
| <i>SiO<sub>2</sub>/TiO<sub>2</sub></i> | 29.6                             | 2.0                     | 63.6       | 3.9        |

**Table S3.** ICP-OES analysis of composite aerogel structures

| <i>Elements</i>            | <i>SiO<sub>2</sub></i> | <i>SiO<sub>2</sub>/TiO<sub>2</sub></i> | <i>SiO<sub>2</sub>/TiO<sub>2</sub>/Ag</i> | <i>SiO<sub>2</sub>/TiO<sub>2</sub>/Ag</i> | <i>SiO<sub>2</sub>/TiO<sub>2</sub>/Ag@Au</i> |
|----------------------------|------------------------|----------------------------------------|-------------------------------------------|-------------------------------------------|----------------------------------------------|
| <i>(mg L<sup>-1</sup>)</i> |                        |                                        | <i>(Ti:Ag 10)</i>                         | <i>(Ti:Ag 30)</i>                         |                                              |
| <i>Si</i>                  | 1309.0                 | 689.0                                  | 557.0                                     | 470.0                                     | 309.0                                        |
| <i>Ti</i>                  | <0.5                   | 101.0                                  | 88.0                                      | 102.3                                     | 50.9                                         |
| <i>Ag</i>                  | <0.5                   | <0.5                                   | 7.9                                       | 3.2                                       | 1.8                                          |
| <i>Au</i>                  | <0.5                   | <0.5                                   | <0.5                                      | <0.5                                      | 48.6                                         |

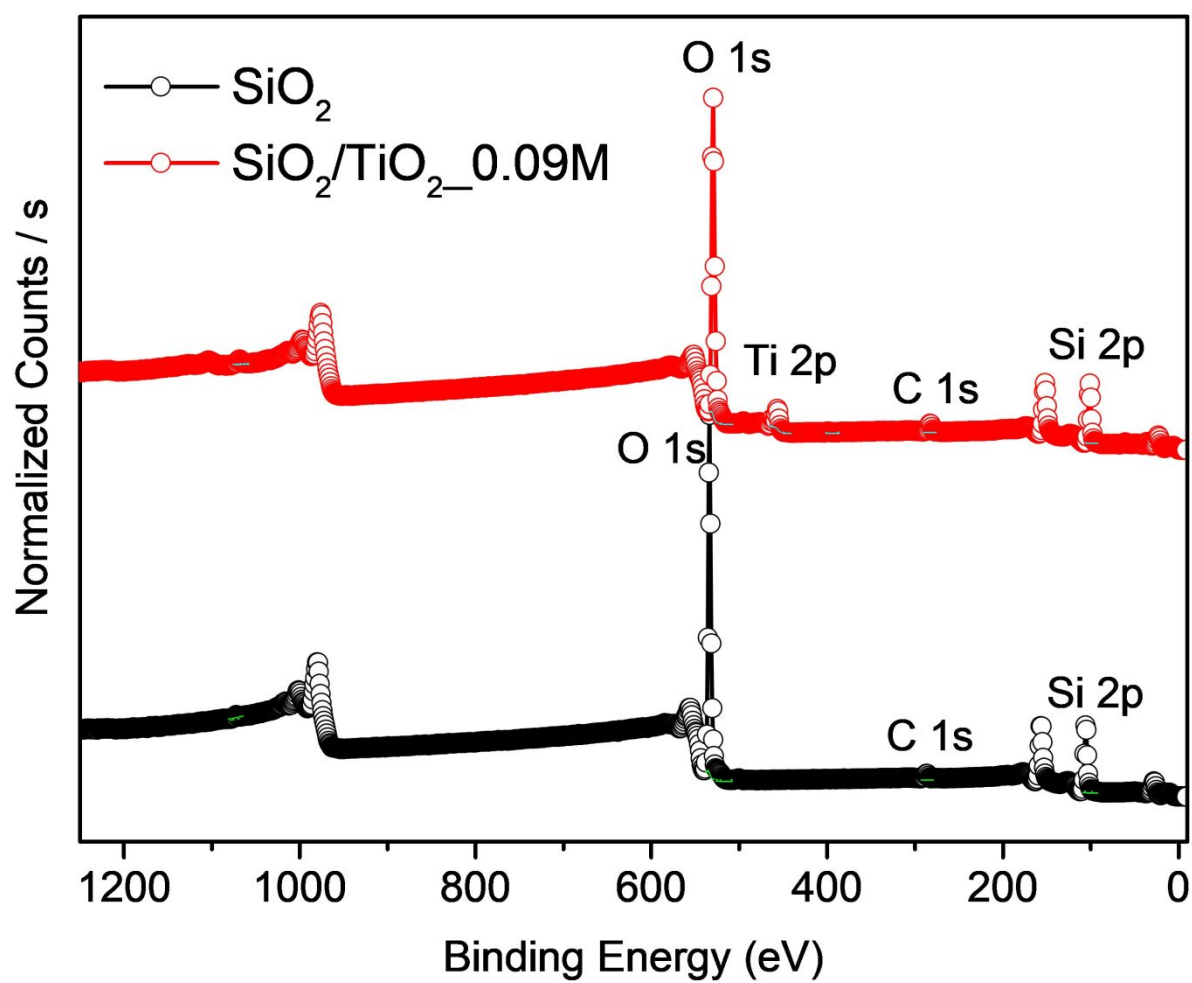

**Figure S1.** XPS survey spectra of  $\text{SiO}_2$  and  $\text{SiO}_2/\text{TiO}_2$  composite aerogels.

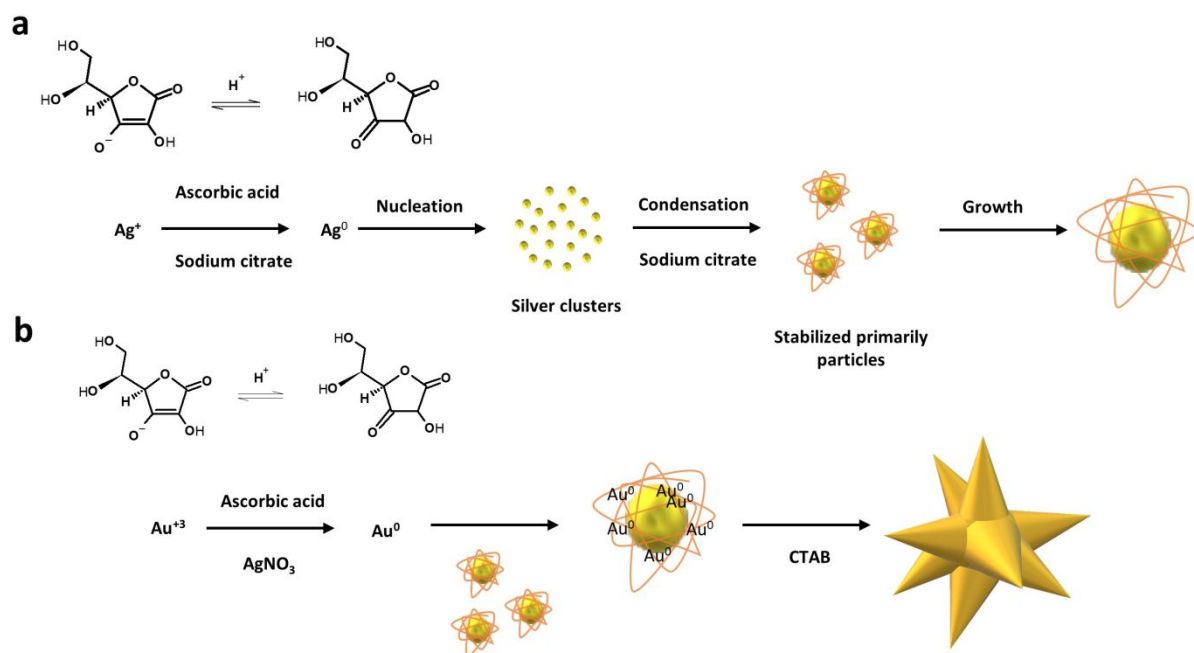

**Figure S2.** Schematic representation of the synthesis of Ag NPs via chemical reduction method (a) and Ag@Au NSs via galvanic replacement method by using pre-synthesized Ag NPs as nucleation centers (b).

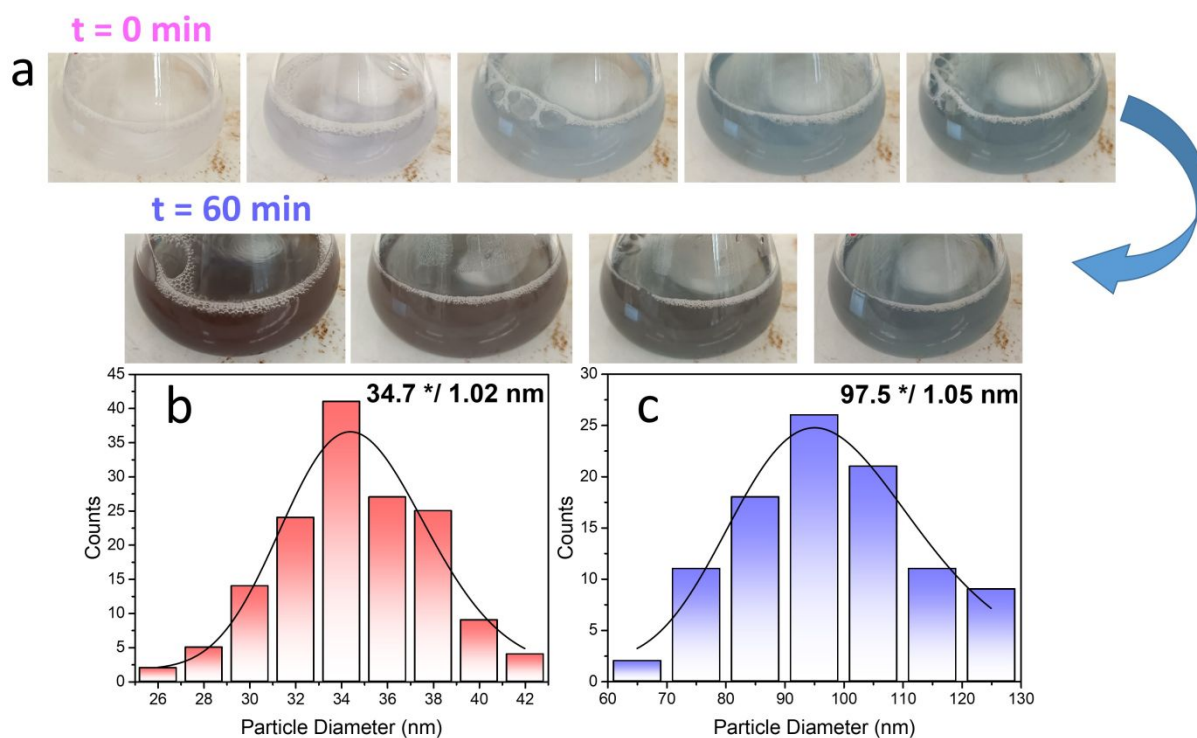

**Figure S3.** The color change of growth solution during the seed-mediated synthesis of Ag@Au NSs onto SiO<sub>2</sub>/TiO<sub>2</sub>/Ag NPs aerogel matrix (a), size distribution graphs of Ag NPs (b) and Ag@Au NSs (tip to tip) (c) grown on SiO<sub>2</sub>/TiO<sub>2</sub> aerogel matrix. The corresponding size distributions of particles were assigned using image analysis software ImageJ and fitting to a log-normal function, expressing in terms of the geometric mean and standard deviation as  $x^*/\sigma^2$  (i.e., for an interval of confidence of 95.5%).

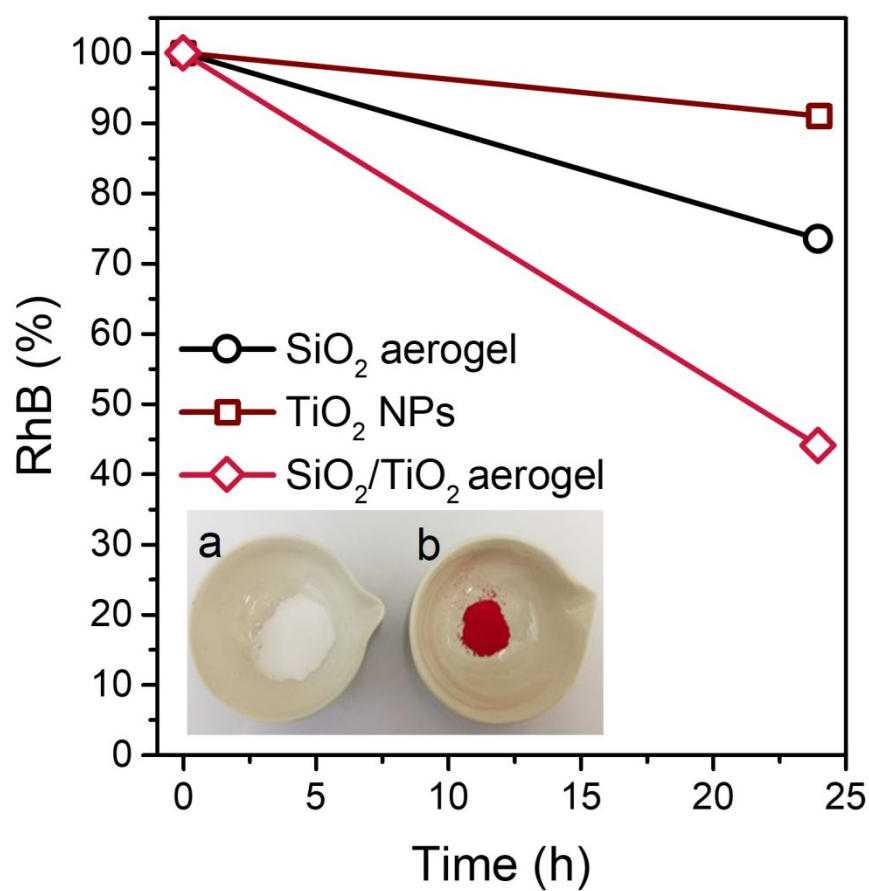

**Figure S4.** RhB adsorption percentages of different particles, (inset: the photograph of SiO<sub>2</sub>/TiO<sub>2</sub> aerogels before (a) and after (b) RhB adsorption)

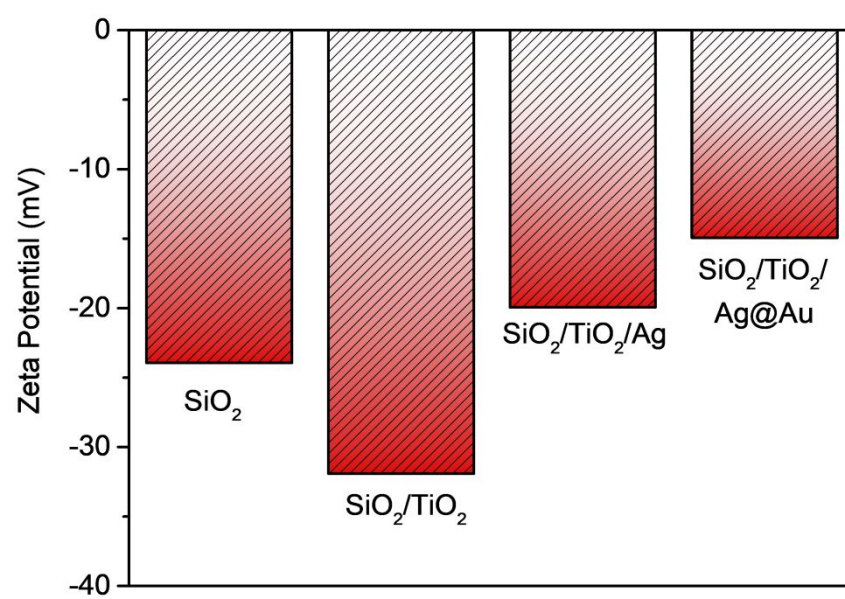

**Figure S5.** Zeta potential values of composite aerogels

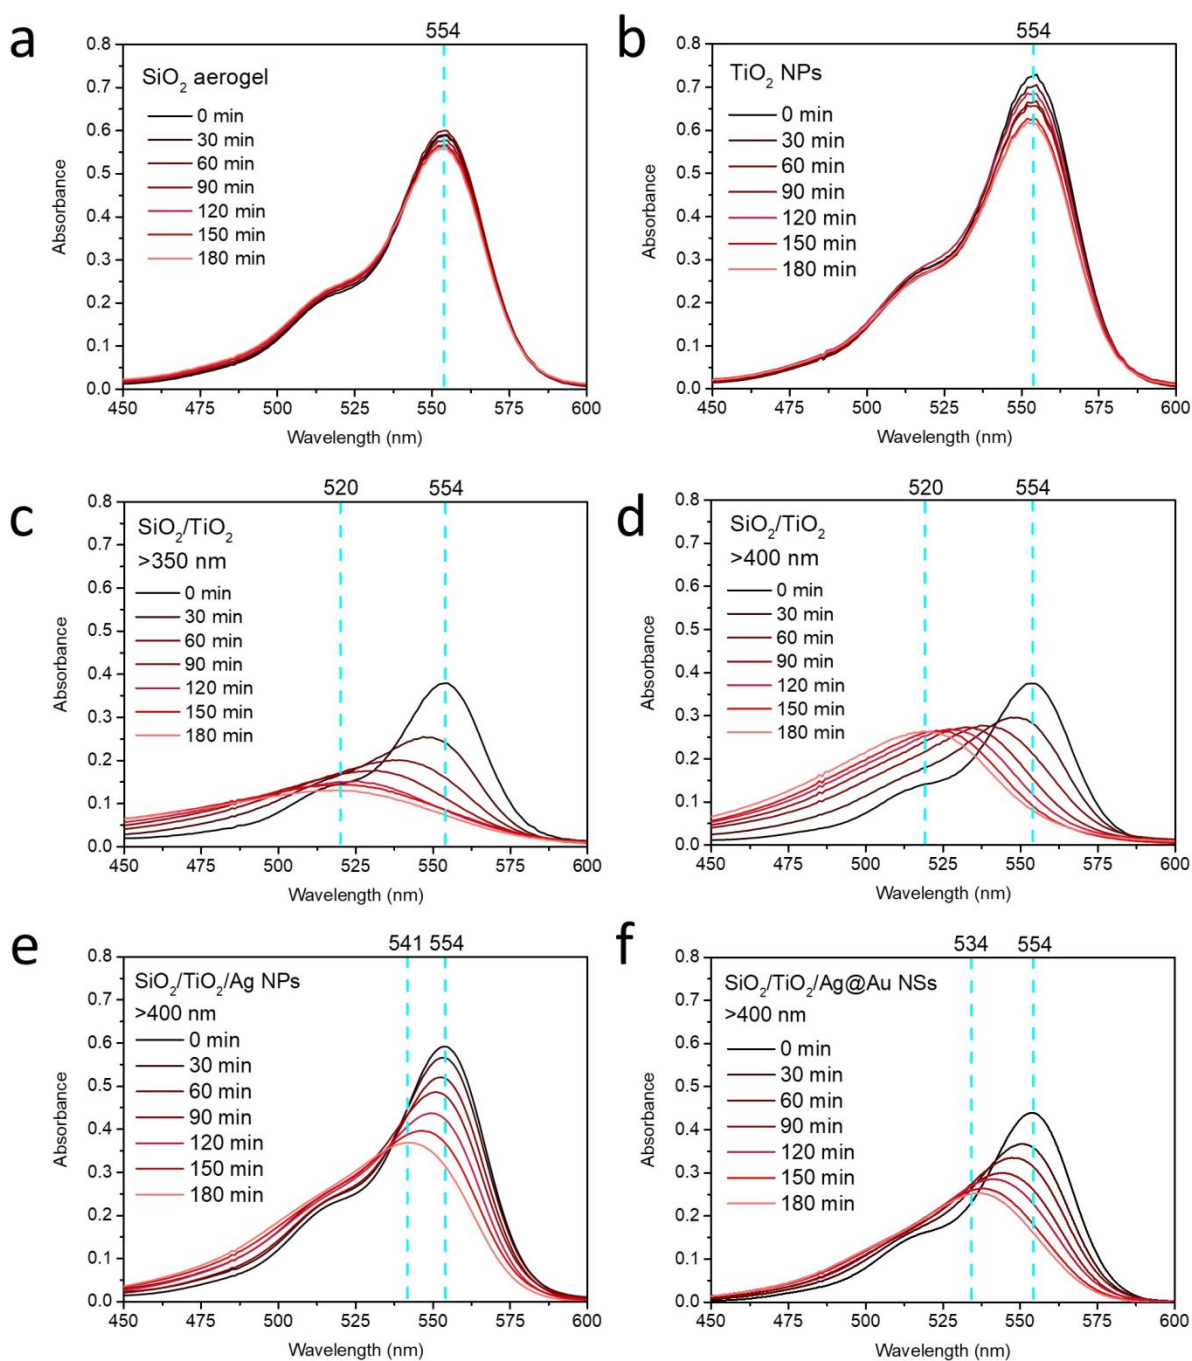

**Figure S6.** UV-vis spectra of RhB dye with the absorbance changes over time as a result of its photodegradation in the presence of SiO<sub>2</sub> aerogels (a), TiO<sub>2</sub> NPs (b), and SiO<sub>2</sub>/TiO<sub>2</sub> aerogel (c) under solar-light irradiation (>350 nm), and SiO<sub>2</sub>/TiO<sub>2</sub> aerogel (d), SiO<sub>2</sub>/TiO<sub>2</sub>/Ag NPs (Ti:Ag 30) (e), and SiO<sub>2</sub>/TiO<sub>2</sub>/Ag@Au NSs under visible-light irradiation (>400 nm) (f).

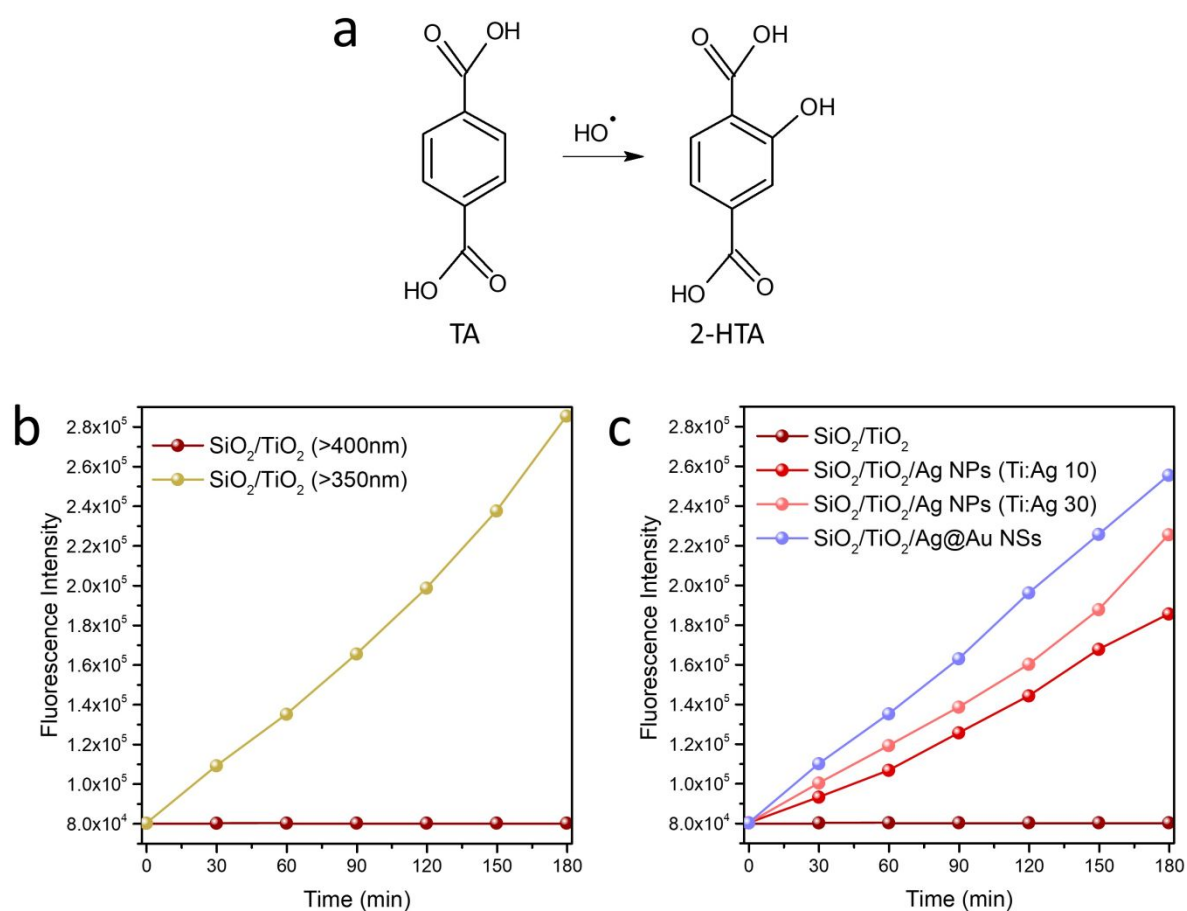

**Figure S7.** The conversion of TA to fluorescent 2-HTA molecules through the reaction with  $\cdot\text{OH}$  radicals (a), Fluorescence spectra of 2-HTA generated by the reactions between TA and  $\cdot\text{OH}$  radicals during photoirradiation of composite aerogels under solar and visible light irradiations. The spectra obtained from  $\text{SiO}_2/\text{TiO}_2$  composite aerogels under solar (>350 nm)- and visible (>400 nm)-light irradiations (b), and from plasmonic NPs-enriched  $\text{SiO}_2/\text{TiO}_2$  aerogels under visible (>400 nm)-light irradiation (c).

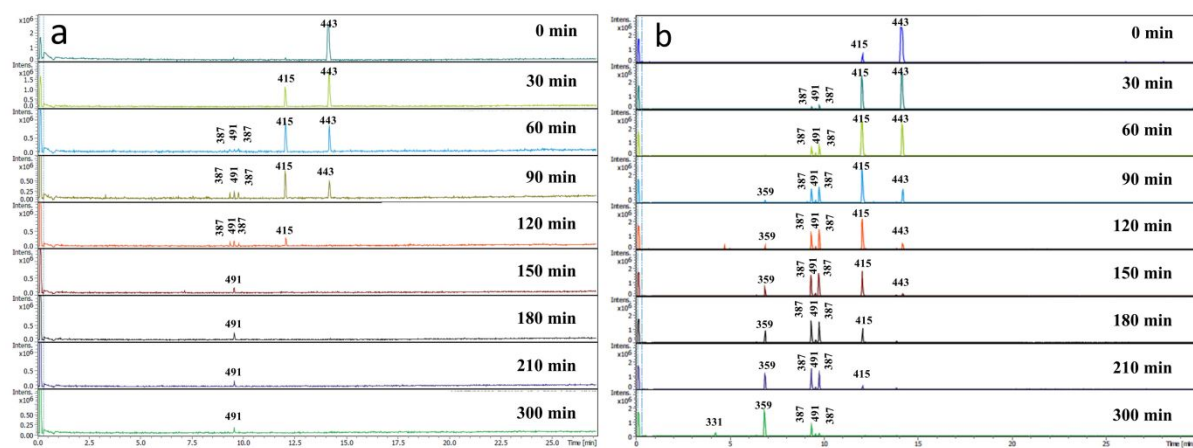

**Figure S8.** Mass spectrometry analysis of RhB products after photodegradation studies under solar (a) and visible light (b) irradiations in the presence of SiO<sub>2</sub>/TiO<sub>2</sub> aerogels
